# Supplementary material for: Shape‐Controlled Generation of Gold Nanoparticles Assisted by Dual‐Molecules: The Development of Hydrogen Peroxide and Oxidase‐Based Biosensors
Source: Hindawi journal article supplement (doi:10.1155/2014/576082), 2014-01-01
Supplement: f1 [file 576082.f1.pdf]

# Shape-controlled generation of gold nanoparticles assisted by dual-molecules: the development of hydrogen peroxide and oxidase-based biosensors

Chifang Peng,<sup>\*†</sup> Xiaohui Duan,<sup>†</sup> Zhengjun Xie,<sup>†</sup> and Chunli Liu<sup>†</sup>

<sup>†</sup>State Key Lab of Food Science and Technology, School of Food Science and Technology, Jiangnan University

Correspondence should be addressed to Chifang Peng; [pcf@jiangnan.edu.cn](mailto:pcf@jiangnan.edu.cn)

## **SUPPLEMENTARY MATERIAL**

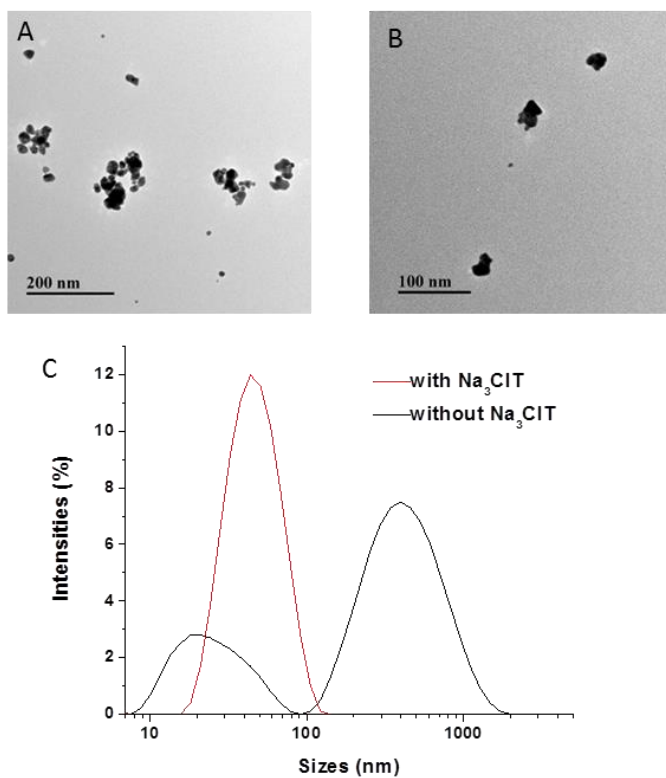

**Fig. S1** Effect of sodium citrate on the shape and size distribution of GNPs produced. TEM images of GNPs generated in the presence (A) and absence (B) of Na<sub>3</sub>CIT; DLS measurements of GNPs generated in the presence and absence of Na<sub>3</sub>CIT (C).

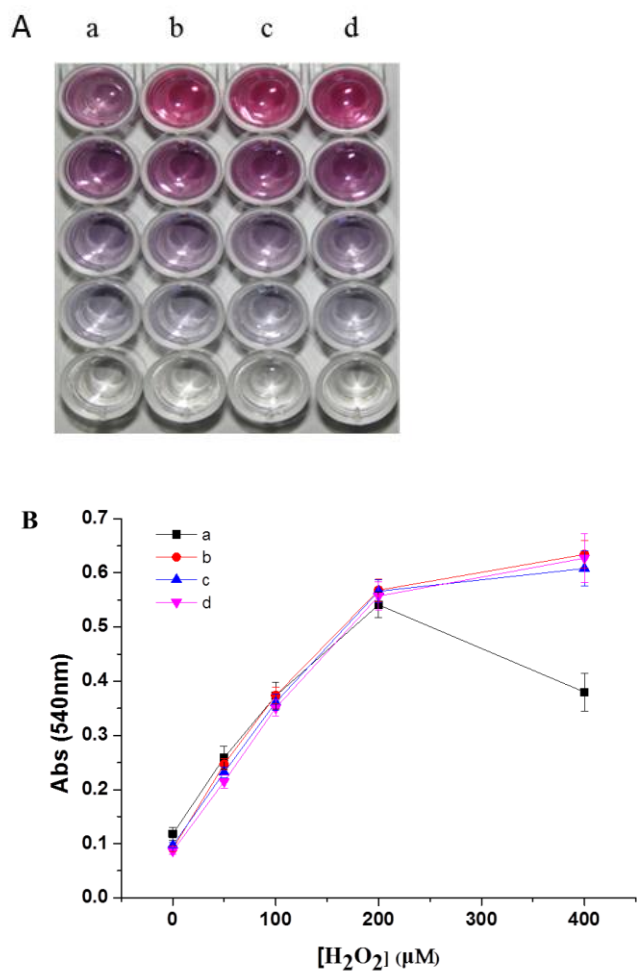

**Figure S2.** Effect of sodium citrate concentration on sensing H<sub>2</sub>O<sub>2</sub>.

(A) Photograph showing the generation of GNPs solution. From bottom line to up line, the H<sub>2</sub>O<sub>2</sub> concentrations were 0, 50, 100, 200 and 400 μM, respectively.

(B) Absorbance values at 540 nm as a function of H<sub>2</sub>O<sub>2</sub> concentration.

Reaction condition: 3uL H<sub>Au</sub>CL<sub>4</sub> (20 mM), 6uL Na<sub>3</sub>CIT (20 mM) (a), 40 mM (b), 80 mM (c) or 120 mM (d), 91 uL MES (2.0 mM, pH 6.5) and 100 uL H<sub>2</sub>O<sub>2</sub>.

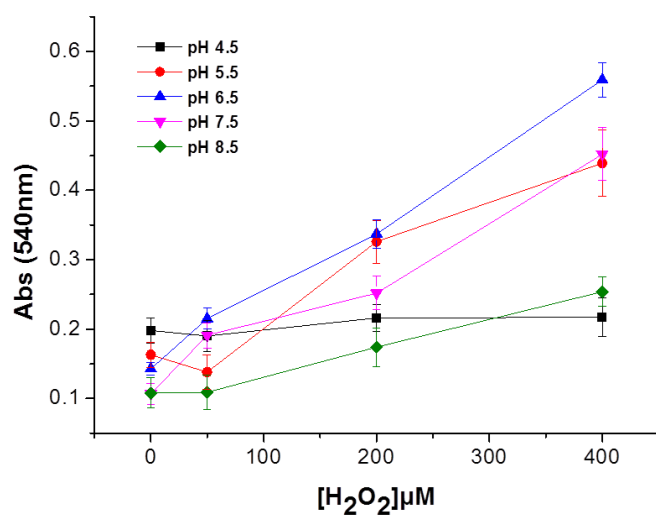

**Figure S3.** Effect of the MES pH on  $\text{H}_2\text{O}_2$  sensing.

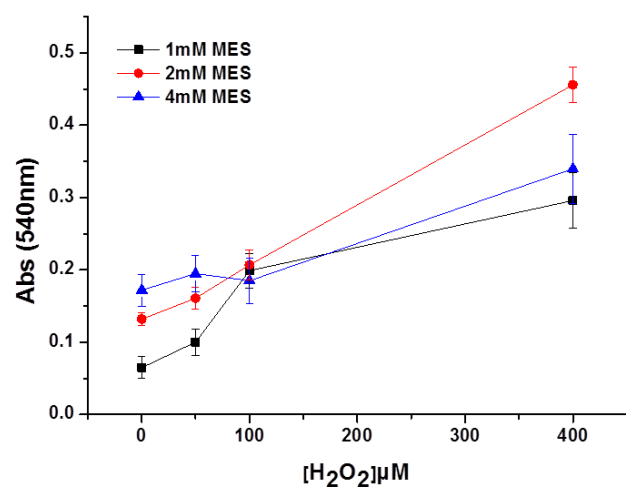

**Figure S4.** Effect of the MES concentration on  $\text{H}_2\text{O}_2$  sensing.
